# Supplementary material for: Fluorometric “Turn-On” glucose sensing through the in situ generation of silver nanoclusters
Source: Royal Society of Chemistry journal article supplement (doi:10.1039/c6ra26303h), 2017-01-01
Supplement: c6ra26303h1.pdf [file c6ra26303h1.pdf]

## Electronic Supplementary Material

### Fluorometric “Turn-On” Glucose Sensing through the In Situ Generation of Silver Nanoclusters

Yang Chen,<sup>a,\*</sup> Yuanqing Sun,<sup>a,b</sup> Rongjun Song,<sup>a</sup> Shanliang Song,<sup>b</sup> Yue Zhao,<sup>b</sup> Xudong  
Yang,<sup>b</sup> Cong Yu,<sup>c</sup> Quan Lin<sup>b,\*</sup>

<sup>a</sup>College of Science, Northeast Forestry University, Harbin, P. R. China, 150040

<sup>b</sup>State Key Laboratory of Supramolecular Structure and Materials, College of  
Chemistry, Jilin University, Changchun, P. R. China, 130012

<sup>c</sup>State Key Laboratory of Electroanalytical Chemistry, Changchun Institute of Applied  
Chemistry, Chinese Academy of Sciences, Changchun, P. R. China, 130022

\*Corresponding authors:

Dr. Yang Chen

E-mail: [ychen@nefu.edu.cn](mailto:ychen@nefu.edu.cn)

Prof. Quan Lin

E-mail:

[linquan@jlu.edu.cn](mailto:linquan@jlu.edu.cn)

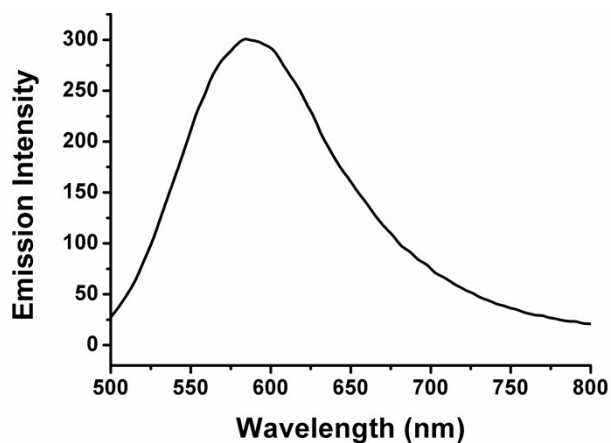

**Fig. S1** Emission spectrum of the Ag NCs prepared from the commercial PMAA (Mw = 6500).

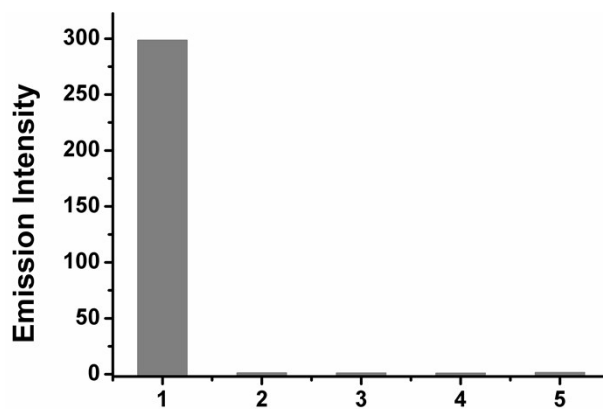

**Fig. S2** Emission intensity of the sample solutions containing different starting materials. Samples: (1) glucose + GOx + MAA + Ag<sup>+</sup>, (2) GOx + MAA + Ag<sup>+</sup>, (3) glucose + MAA + Ag<sup>+</sup>, (4) glucose + GOx + Ag<sup>+</sup>, and (5) MAA + Ag<sup>+</sup>.

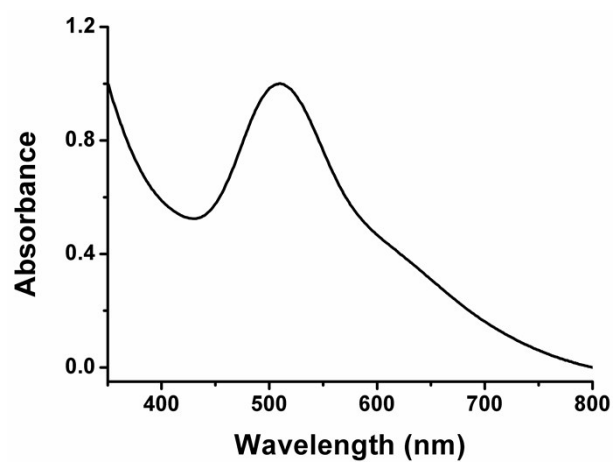

**Fig. S3** UV-Vis absorption spectrum of the Ag NCs. Conditions: 600  $\mu$ M glucose, 400 mM MAA, 4 min illumination.

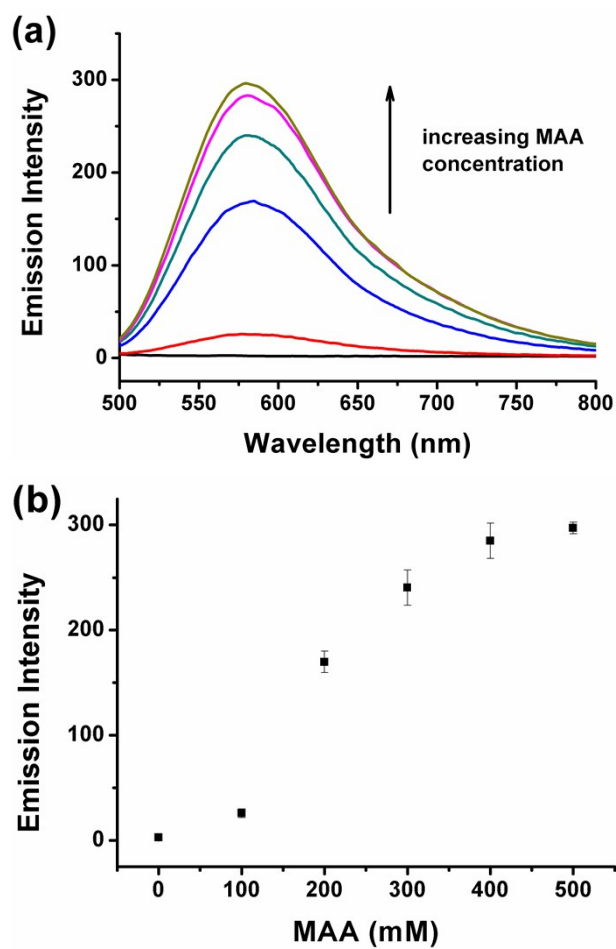

**Fig. S4** (a) Changes in emission spectrum as a function of MAA concentration. (b) Changes in maximum emission intensity of (a) versus MAA concentration. Conditions: 600  $\mu$ M glucose, 4 min illumination.

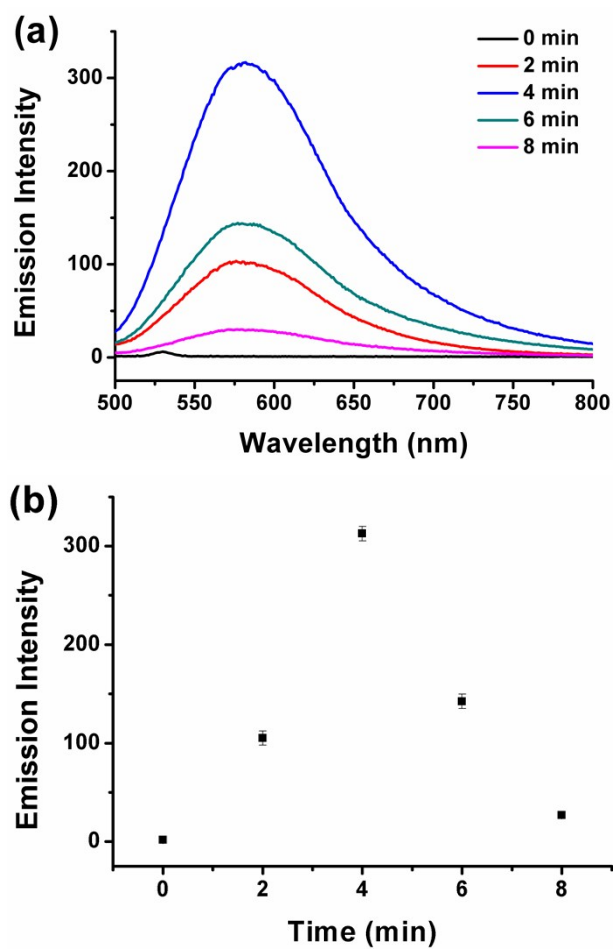

**Fig. S5** (a) Changes in emission spectrum as a function of the illumination time, (b) changes in maximum emission intensity of (a) versus the illumination time.

Conditions: 600  $\mu$ M glucose, 400 mM MAA.
